# Supplementary material for: LCN2 Is a Potential Biomarker for Radioresistance and Recurrence in Nasopharyngeal Carcinoma
Source: Front Oncol. 2021 Feb 2;10:605777. doi: 10.3389/fonc.2020.605777 (PMC7885862; doi:10.3389/fonc.2020.605777)
Supplement: Supplementary file 1 [file Table_1.xlsx]

## Sheet: Sheet1
Sample	Title	Value	Rank
GSM245404	Radiosensitive tumor-untreated-rep1 (c1)	363.1	62
GSM245405	Radiosensitive tumor-untreated-rep2 (c2)	317.6	60
GSM245406	Radiosensitive tumor-untreated-rep3 (c3)	410.9	66
GSM245410	Radiosensitive tumor-5 hours post-IR-rep1	404.7	67
GSM245411	Radiosensitive tumor-5 hours post-IR-rep2	495.7	71
GSM245412	Radiosensitive tumor-5 hours post-IR-rep3	328.3	59
GSM245416	Radiosensitive tumor-24 hours post-IR-rep1	841.4	82
GSM245417	Radiosensitive tumor-24 hours post-IR-rep2	508.9	67
GSM245418	Radiosensitive tumor-24 hours post-IR-rep3	622.2	76
GSM245401	Radioresistant tumor-untreated-rep1 (c1)	1062.6	86
GSM245402	Radioresistant tumor-untreated-rep2 (c2)	656.4	77
GSM245403	Radioresistant tumor-untreated-rep3 (c3)	913.4	84
GSM245407	Radioresistant tumor-5 hours post-IR-rep1	1304.2	89
GSM245408	Radioresistant tumor-5 hours post-IR-rep2	1467.7	90
GSM245409	Radioresistant tumor-5 hours post-IR-rep3	830.7	82
GSM245413	Radioresistant tumor-24 hours post-IR-rep1	1453.2	90
GSM245414	Radioresistant tumor-24 hours post-IR-rep2	1160.6	87
GSM245415	Radioresistant tumor-24 hours post-IR-rep3	1031	86
